# Supplementary material for: Analyses of Mosquito Species Composition, Blood-Feeding Habits and Infection with Insect-Specific Flaviviruses in Two Arid, Pastoralist-Dominated Counties in Kenya
Source: MDPI journal article supplement (doi:10.3390/pathogens12070967), 2023-07-24
Supplement: s1 [file s1]

|                                          | M422 | M287 | M138 | M317B | M211B | KM151 | KM174 | Aedes flavivirus NC_012932 | Aedes flavivirus KJ741266 | Cell fusing agent virus KP792624 | Aedes tricholabis flavivirus KM088042 | Kamiti River virus NC_005064 | Mac peak virus NC_035187 | Karumba virus MF352615 | Dairy Swamp virus MF352618 | Haslams Creek virus MF352617 | Parramatta River virus KT192549 | Hanko virus JQ268258 | Ochlerotatus caspius flavivirus HF548540 | Palm Creek virus KC505248 | Nakiwogo virus GQ165809 | Cuacua virus KX245154 | Nienokoue virus NC_024299 | Culex flavivirus NC_008604 | QuangBinh virus NC_012671 | Rio Bravo virus JQ582840 | Modoc virus NC_003635 | Japanese encephalitis virus NC_001437 | Usutu virus NC_006551 | Chaoyang virus JQ068102 | Lammi virus KC692068 |
|------------------------------------------|------|------|------|-------|-------|-------|-------|----------------------------|---------------------------|----------------------------------|---------------------------------------|------------------------------|--------------------------|------------------------|----------------------------|------------------------------|---------------------------------|----------------------|------------------------------------------|---------------------------|-------------------------|-----------------------|---------------------------|----------------------------|---------------------------|--------------------------|-----------------------|---------------------------------------|-----------------------|-------------------------|----------------------|
| M422                                     |      | 99%  | 99%  | 55%   | 55%   | 55%   | 55%   | 59%                        | 59%                       | 58%                              | 56%                                   | 61%                          | 59%                      | 63%                    | 63%                        | 62%                          | 59%                             | 56%                  | 59%                                      | 70%                       | 72%                     | 94%                   | 70%                       | 60%                        | 64%                       | 49%                      | 48%                   | 44%                                   | 45%                   | 46%                     | 49%                  |
| M287                                     | 99%  |      | 100% | 55%   | 55%   | 55%   | 55%   | 59%                        | 59%                       | 59%                              | 56%                                   | 62%                          | 60%                      | 63%                    | 64%                        | 63%                          | 59%                             | 56%                  | 59%                                      | 70%                       | 72%                     | 94%                   | 70%                       | 60%                        | 64%                       | 50%                      | 49%                   | 44%                                   | 45%                   | 47%                     | 49%                  |
| M138                                     | 99%  | 100% |      | 55%   | 55%   | 55%   | 55%   | 59%                        | 59%                       | 58%                              | 56%                                   | 62%                          | 59%                      | 63%                    | 64%                        | 63%                          | 60%                             | 56%                  | 59%                                      | 70%                       | 72%                     | 95%                   | 70%                       | 60%                        | 64%                       | 50%                      | 49%                   | 44%                                   | 45%                   | 47%                     | 49%                  |
| M317B                                    | 55%  | 55%  | 55%  |       | 100%  | 100%  | 100%  | 72%                        | 72%                       | 67%                              | 67%                                   | 75%                          | 54%                      | 55%                    | 60%                        | 54%                          | 56%                             | 58%                  | 58%                                      | 59%                       | 63%                     | 54%                   | 57%                       | 51%                        | 55%                       | 44%                      | 45%                   | 40%                                   | 43%                   | 47%                     | 43%                  |
| M211B                                    | 55%  | 55%  | 55%  | 100%  |       | 100%  | 100%  | 72%                        | 72%                       | 67%                              | 67%                                   | 75%                          | 54%                      | 55%                    | 60%                        | 54%                          | 56%                             | 58%                  | 58%                                      | 59%                       | 63%                     | 54%                   | 57%                       | 51%                        | 55%                       | 44%                      | 45%                   | 40%                                   | 43%                   | 47%                     | 43%                  |
| KM151                                    | 55%  | 55%  | 55%  | 100%  | 100%  |       | 100%  | 72%                        | 72%                       | 67%                              | 67%                                   | 75%                          | 54%                      | 55%                    | 60%                        | 54%                          | 56%                             | 58%                  | 58%                                      | 59%                       | 63%                     | 54%                   | 57%                       | 51%                        | 55%                       | 44%                      | 45%                   | 40%                                   | 43%                   | 47%                     | 43%                  |
| KM174                                    | 55%  | 55%  | 55%  | 100%  | 100%  | 100%  |       | 72%                        | 72%                       | 67%                              | 67%                                   | 75%                          | 54%                      | 55%                    | 60%                        | 54%                          | 56%                             | 58%                  | 58%                                      | 59%                       | 63%                     | 54%                   | 57%                       | 51%                        | 55%                       | 44%                      | 45%                   | 40%                                   | 43%                   | 47%                     | 43%                  |
| Aedes flavivirus NC_012932               | 59%  | 59%  | 59%  | 72%   | 72%   | 72%   | 72%   |                            | 91%                       | 70%                              | 68%                                   | 71%                          | 59%                      | 57%                    | 59%                        | 60%                          | 59%                             | 61%                  | 62%                                      | 61%                       | 62%                     | 56%                   | 55%                       | 55%                        | 56%                       | 44%                      | 47%                   | 42%                                   | 43%                   | 46%                     | 46%                  |
| Aedes flavivirus KJ741266                | 59%  | 59%  | 59%  | 72%   | 72%   | 72%   | 72%   | 91%                        |                           | 70%                              | 71%                                   | 74%                          | 59%                      | 57%                    | 61%                        | 61%                          | 56%                             | 60%                  | 60%                                      | 62%                       | 62%                     | 57%                   | 58%                       | 51%                        | 57%                       | 44%                      | 47%                   | 43%                                   | 45%                   | 45%                     | 44%                  |
| Cell fusing agent virus KP792624         | 58%  | 59%  | 58%  | 67%   | 67%   | 67%   | 67%   | 70%                        | 70%                       |                                  | 74%                                   | 73%                          | 60%                      | 59%                    | 59%                        | 59%                          | 63%                             | 59%                  | 59%                                      | 59%                       | 65%                     | 56%                   | 59%                       | 56%                        | 53%                       | 44%                      | 46%                   | 44%                                   | 43%                   | 47%                     | 45%                  |
| Aedes tricholabis flavivirus KM088042    | 56%  | 56%  | 56%  | 67%   | 67%   | 67%   | 67%   | 68%                        | 71%                       | 74%                              |                                       | 75%                          | 57%                      | 60%                    | 59%                        | 60%                          | 64%                             | 61%                  | 61%                                      | 60%                       | 60%                     | 56%                   | 61%                       | 52%                        | 55%                       | 42%                      | 44%                   | 44%                                   | 43%                   | 43%                     | 44%                  |
| Kamiti River virus NC_005064             | 61%  | 62%  | 62%  | 75%   | 75%   | 75%   | 75%   | 71%                        | 74%                       | 73%                              | 75%                                   |                              | 59%                      | 61%                    | 62%                        | 60%                          | 61%                             | 58%                  | 59%                                      | 65%                       | 64%                     | 60%                   | 62%                       | 55%                        | 59%                       | 46%                      | 43%                   | 46%                                   | 48%                   | 47%                     | 45%                  |
| Mac peak virus NC_035187                 | 59%  | 60%  | 59%  | 54%   | 54%   | 54%   | 54%   | 59%                        | 59%                       | 60%                              | 57%                                   | 59%                          |                          | 75%                    | 76%                        | 76%                          | 63%                             | 63%                  | 65%                                      | 58%                       | 60%                     | 59%                   | 63%                       | 64%                        | 58%                       | 49%                      | 47%                   | 47%                                   | 46%                   | 47%                     | 47%                  |
| Karumba virus MF352615                   | 63%  | 63%  | 63%  | 55%   | 55%   | 55%   | 55%   | 57%                        | 57%                       | 59%                              | 60%                                   | 61%                          | 75%                      |                        | 74%                        | 75%                          | 64%                             | 61%                  | 62%                                      | 59%                       | 63%                     | 64%                   | 68%                       | 63%                        | 64%                       | 49%                      | 45%                   | 48%                                   | 43%                   | 42%                     | 46%                  |
| Dairy Swamp virus MF352618               | 63%  | 64%  | 64%  | 60%   | 60%   | 60%   | 60%   | 59%                        | 61%                       | 59%                              | 59%                                   | 62%                          | 76%                      | 74%                    |                            | 81%                          | 62%                             | 60%                  | 63%                                      | 57%                       | 63%                     | 61%                   | 67%                       | 57%                        | 58%                       | 48%                      | 46%                   | 44%                                   | 44%                   | 42%                     | 43%                  |
| Haslams Creek virus MF352617             | 62%  | 63%  | 63%  | 54%   | 54%   | 54%   | 54%   | 60%                        | 61%                       | 59%                              | 60%                                   | 60%                          | 76%                      | 75%                    | 81%                        |                              | 62%                             | 62%                  | 62%                                      | 60%                       | 64%                     | 62%                   | 67%                       | 61%                        | 59%                       | 47%                      | 48%                   | 46%                                   | 42%                   | 42%                     | 43%                  |
| Parramatta River virus KT192549          | 59%  | 59%  | 60%  | 56%   | 56%   | 56%   | 56%   | 59%                        | 56%                       | 63%                              | 64%                                   | 61%                          | 63%                      | 64%                    | 62%                        | 62%                          |                                 | 75%                  | 77%                                      | 57%                       | 56%                     | 57%                   | 62%                       | 61%                        | 54%                       | 48%                      | 49%                   | 46%                                   | 46%                   | 43%                     | 48%                  |
| Hanko virus JQ268258                     | 56%  | 56%  | 56%  | 58%   | 58%   | 58%   | 58%   | 61%                        | 60%                       | 59%                              | 61%                                   | 58%                          | 63%                      | 61%                    | 60%                        | 62%                          | 75%                             |                      | 89%                                      | 62%                       | 57%                     | 54%                   | 59%                       | 56%                        | 57%                       | 51%                      | 50%                   | 45%                                   | 49%                   | 49%                     | 47%                  |
| Ochlerotatus caspius flavivirus HF548540 | 59%  | 59%  | 59%  | 58%   | 58%   | 58%   | 58%   | 62%                        | 60%                       | 59%                              | 61%                                   | 59%                          | 65%                      | 62%                    | 63%                        | 62%                          | 77%                             | 89%                  |                                          | 55%                       | 56%                     | 56%                   | 57%                       | 55%                        | 56%                       | 49%                      | 50%                   | 44%                                   | 47%                   | 49%                     | 48%                  |
| Palm Creek virus KC505248                | 70%  | 70%  | 70%  | 59%   | 59%   | 59%   | 59%   | 61%                        | 62%                       | 59%                              | 60%                                   | 65%                          | 58%                      | 59%                    | 57%                        | 60%                          | 57%                             | 62%                  | 55%                                      |                           | 72%                     | 69%                   | 66%                       | 61%                        | 63%                       | 50%                      | 48%                   | 43%                                   | 45%                   | 47%                     | 46%                  |
| Nakiwogo virus GQ165809                  | 72%  | 72%  | 72%  | 63%   | 63%   | 63%   | 63%   | 62%                        | 62%                       | 65%                              | 60%                                   | 64%                          | 60%                      | 63%                    | 63%                        | 64%                          | 56%                             | 57%                  | 56%                                      | 72%                       |                         | 70%                   | 68%                       | 63%                        | 65%                       | 51%                      | 49%                   | 44%                                   | 45%                   | 45%                     | 49%                  |
| Cuacua virus KX245154                    | 94%  | 94%  | 95%  | 54%   | 54%   | 54%   | 54%   | 56%                        | 57%                       | 56%                              | 56%                                   | 60%                          | 59%                      | 64%                    | 61%                        | 62%                          | 57%                             | 54%                  | 56%                                      | 69%                       | 70%                     |                       | 69%                       | 60%                        | 64%                       | 51%                      | 48%                   | 44%                                   | 43%                   | 46%                     | 48%                  |
| Nienokoue virus NC_024299                | 70%  | 70%  | 70%  | 57%   | 57%   | 57%   | 57%   | 55%                        | 58%                       | 59%                              | 61%                                   | 62%                          | 63%                      | 68%                    | 67%                        | 67%                          | 62%                             | 59%                  | 57%                                      | 66%                       | 68%                     | 69%                   |                           | 62%                        | 69%                       | 50%                      | 49%                   | 48%                                   | 45%                   | 44%                     | 46%                  |
| Culex flavivirus NC_008604               | 60%  | 60%  | 60%  | 51%   | 51%   | 51%   | 51%   | 55%                        | 51%                       | 56%                              | 52%                                   | 55%                          | 64%                      | 63%                    | 57%                        | 61%                          | 61%                             | 56%                  | 55%                                      | 61%                       | 63%                     | 60%                   | 62%                       |                            | 70%                       | 49%                      | 42%                   | 43%                                   | 44%                   | 46%                     | 44%                  |
| QuangBinh virus NC_012671                | 64%  | 64%  | 64%  | 55%   | 55%   | 55%   | 55%   | 56%                        | 57%                       | 53%                              | 55%                                   | 59%                          | 58%                      | 64%                    | 58%                        | 59%                          | 54%                             | 57%                  | 56%                                      | 63%                       | 65%                     | 64%                   | 69%                       | 70%                        |                           | 53%                      | 46%                   | 42%                                   | 43%                   | 44%                     | 44%                  |
| Rio Bravo virus JQ582840                 | 49%  | 50%  | 50%  | 44%   | 44%   | 44%   | 44%   | 44%                        | 44%                       | 44%                              | 42%                                   | 46%                          | 49%                      | 49%                    | 48%                        | 47%                          | 48%                             | 51%                  | 49%                                      | 50%                       | 51%                     | 51%                   | 50%                       | 49%                        | 53%                       |                          | 66%                   | 56%                                   | 61%                   | 51%                     | 52%                  |
| Modoc virus NC_003635                    | 48%  | 49%  | 49%  | 45%   | 45%   | 45%   | 45%   | 47%                        | 47%                       | 46%                              | 44%                                   | 43%                          | 47%                      | 45%                    | 46%                        | 48%                          | 49%                             | 50%                  | 50%                                      | 48%                       | 49%                     | 48%                   | 49%                       | 42%                        | 46%                       | 66%                      |                       | 61%                                   | 57%                   | 53%                     | 57%                  |
| Japanese encephalitis virus NC_001437    | 44%  | 44%  | 44%  | 40%   | 40%   | 40%   | 40%   | 42%                        | 43%                       | 44%                              | 44%                                   | 46%                          | 47%                      | 48%                    | 44%                        | 46%                          | 46%                             | 45%                  | 44%                                      | 43%                       | 44%                     | 44%                   | 48%                       | 43%                        | 42%                       | 56%                      | 61%                   |                                       | 73%                   | 57%                     | 65%                  |
| Usutu virus NC_006551                    | 45%  | 45%  | 45%  | 43%   | 43%   | 43%   | 43%   | 43%                        | 45%                       | 43%                              | 43%                                   | 48%                          | 46%                      | 43%                    | 44%                        | 42%                          | 46%                             | 49%                  | 47%                                      | 45%                       | 45%                     | 43%                   | 45%                       | 44%                        | 43%                       | 61%                      | 57%                   | 73%                                   |                       | 64%                     | 64%                  |
| Chaoyang virus JQ068102                  | 46%  | 47%  | 47%  | 47%   | 47%   | 47%   | 47%   | 46%                        | 45%                       | 47%                              | 43%                                   | 47%                          | 47%                      | 42%                    | 42%                        | 42%                          | 43%                             | 49%                  | 49%                                      | 47%                       | 45%                     | 46%                   | 44%                       | 46%                        | 44%                       | 51%                      | 53%                   | 57%                                   | 64%                   |                         | 82%                  |
| Lammi virus KC692068                     | 49%  | 49%  | 49%  | 43%   | 43%   | 43%   | 43%   | 46%                        | 44%                       | 45%                              | 44%                                   | 45%                          | 47%                      | 46%                    | 43%                        | 43%                          | 48%                             | 47%                  | 48%                                      | 46%                       | 49%                     | 48%                   | 46%                       | 44%                        | 44%                       | 52%                      | 57%                   | 65%                                   | 64%                   | 82%                     |                      |

Figure S1: Classical Insect specific flaviviruses (cISFs) distance matrix. Distance matrix of the partial RdRp gene showing of representative viruses and samples sequenced in the present study (red). Light grey to dark shades represent nucleotide distances.
